# Supplementary material for: Atropisomerisation in sterically hindered α,β-disubstituted cyclopentenones derived from an intermolecular cobalt(0)-mediated Pauson–Khand reaction
Source: Royal Society of Chemistry journal article supplement (doi:10.1039/c0ob00264j), 2010-01-01

## Supporting Information for:

# Atropisomerisation in sterically hindered $\alpha,\beta$ -disubstituted cyclopentenones derived from an intermolecular cobalt(0)-mediated Pauson-Khand reaction†

Benjamin E. Moulton,<sup>a</sup> Jason M. Lynam,<sup>a</sup> Anne-Kathrin Duhme-Klair,<sup>a</sup> Wenxu Zheng,<sup>b</sup> Zhenyang Lin<sup>b\*</sup> and Ian J. S. Fairlamb<sup>a\*</sup>

<sup>a</sup> Department of Chemistry, University of York, Heslington, York, YO10 5DD, U.K.  
Fax: +44 1904 432516; Tel: +44 1904 434091; E-mail: [ijsf1@york.ac.uk](mailto:ijsf1@york.ac.uk)

<sup>b</sup> Department of Chemistry, The Hong Kong University of Science and Technology, Clear Water Bay, Kowloon, Hong Kong, P. R. China. E-mail: [chzlin@ust.hk](mailto:chzlin@ust.hk)

\* Joint corresponding authors. For details concerning the theoretical calculations contact Z.L., and the experimental studies I.J.S.F.

## Table of Contents:

---

**1.0 X-ray diffraction data and information**

**2.0 Cartesian coordinates of the optimized geometries**

**3.0 Representative NMR spectra of compounds 5, 6 and 7 $\alpha$  and 7 $\beta$**

---

## 1.0 X-ray diffraction data and information

**1.1 General details:** Diffraction data were collected at 110 K (unless otherwise specified in the data below) on a Bruker Smart Apex diffractometer with Mo-K $\alpha$  radiation ( $\lambda = 0.71073 \text{ \AA}$ ) using a SMART CCD camera. Diffractometer control, data collection and initial unit cell determination was performed using "SMART".<sup>1</sup> Frame integration and unit-cell refinement was carried out with "SAINT+."<sup>2</sup> Absorption corrections were applied by SADABS.<sup>c</sup> Structures were solved using SHELXS-97 (Sheldrick, 1997),<sup>1</sup> as indicated in the cif files, and refined by full-matrix least squares using SHELXL-97 (Sheldrick, 1997).<sup>2</sup> All non-hydrogen atoms were refined anisotropically. Hydrogen atoms were placed using a "riding model" and included in the refinement at calculated positions.

The CCDC reference numbers for compounds **6** and **7 $\beta$**  are 780325 and 780326, respectively.

### 1.1.1 References

- 1 "SMART" - control software Bruker SMART Apex X-ray Diffractometer. v5.625, Bruker-AXS GMBH, Karlsruhe, Germany.
- 2 "SAINT+" - integration software for Bruker SMART detectors. v6.45, Bruker-AXS GMBH, Karlsruhe, Germany.
- 3 "SADABS" - program for absorption correction. v2.10. G. M. Sheldrick, Bruker AXS Inc., Madison, Wisconsin, USA, 2007.
- 4 "SHELXS-97" - program for structure solution. G. M. Sheldrick, University of Göttingen, Göttingen, Germany, 1997.
- 5 "SHELXL-97" - program for the Refinement of Crystal Structures. G. M. Sheldrick, University of Göttingen, Göttingen, Germany, 1997.

## 1.2 X-ray structures of **6** and **7 $\beta$**

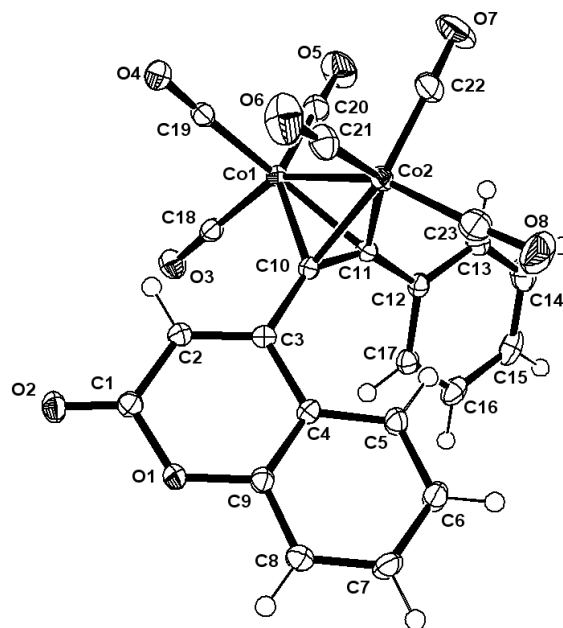

**Figure S1.** X-ray crystal structure of **6** (determined at 110 K). Thermal ellipsoids are shown at 50% probability.

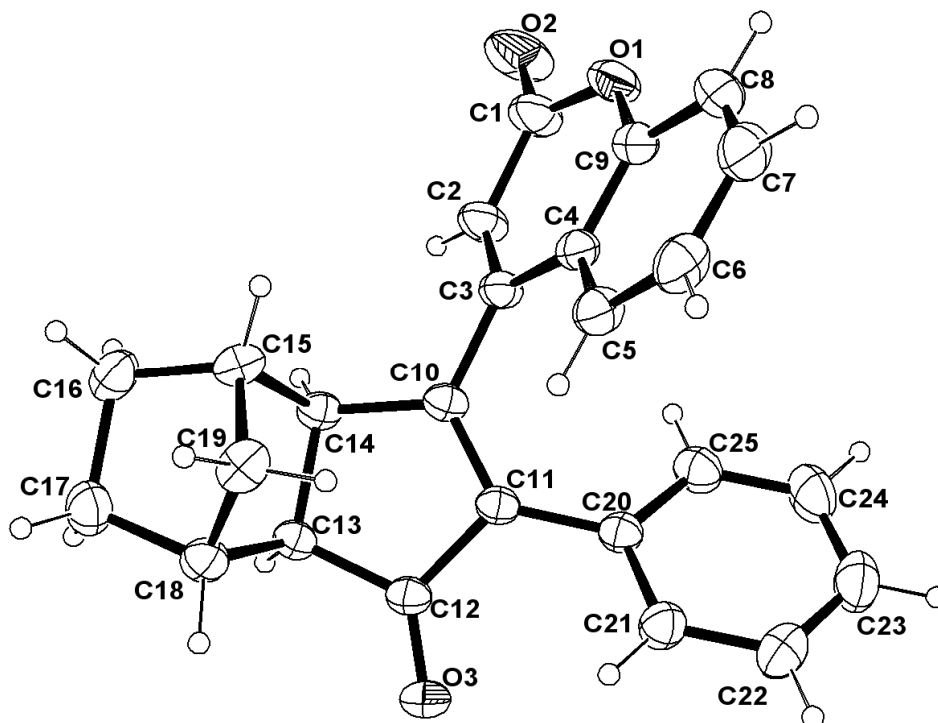

**Figure S2.** X-ray crystal structure of the major regioisomeric product **7 $\beta$**  (determined at 298 K). Thermal ellipsoids are shown at 30% probability.

**Table S1** Key X-ray -data for **6** and **7β**.

---

|                                                                               |                                                                |                                                |
|-------------------------------------------------------------------------------|----------------------------------------------------------------|------------------------------------------------|
| Compound reference                                                            | ijf0629m                                                       | ijf0810a                                       |
| Chemical formula                                                              | C <sub>23</sub> H <sub>10</sub> Co <sub>2</sub> O <sub>8</sub> | C <sub>25</sub> H <sub>20</sub> O <sub>3</sub> |
| Formula Mass                                                                  | 532.17                                                         | 368.41                                         |
| Crystal system                                                                | Triclinic                                                      | Monoclinic                                     |
| <i>a</i> /Å                                                                   | 8.6456(6)                                                      | 13.6217(8)                                     |
| <i>b</i> /Å                                                                   | 8.9910(6)                                                      | 12.1491(7)                                     |
| <i>c</i> /Å                                                                   | 14.7003(10)                                                    | 12.2859(7)                                     |
| <i>α</i> /°                                                                   | 80.2050(10)                                                    | 90.00                                          |
| <i>β</i> /°                                                                   | 74.6770(10)                                                    | 111.6790(10)                                   |
| <i>γ</i> /°                                                                   | 73.2410(10)                                                    | 90.00                                          |
| Unit cell volume/Å <sup>3</sup>                                               | 1049.79(12)                                                    | 1889.40(19)                                    |
| Temperature/K                                                                 | 110(2)                                                         | 298(2)                                         |
| Space group                                                                   | <i>P</i> 1                                                     | <i>P</i> 2(1)/ <i>c</i>                        |
| No. of formula units per unit cell, <i>Z</i>                                  | 2                                                              | 4                                              |
| No. of reflections measured                                                   | 10916                                                          | 19047                                          |
| No. of independent reflections                                                | 5160                                                           | 4702                                           |
| <i>R</i> <sub>int</sub>                                                       | 0.0226                                                         | 0.0258                                         |
| Final <i>R</i> <sub>I</sub> values ( <i>I</i> > 2σ( <i>I</i> ))               | 0.0290                                                         | 0.0464                                         |
| Final <i>wR</i> ( <i>F</i> <sup>2</sup> ) values ( <i>I</i> > 2σ( <i>I</i> )) | 0.0709                                                         | 0.1106                                         |
| Final <i>R</i> <sub>I</sub> values (all data)                                 | 0.0346                                                         | 0.0692                                         |
| Final <i>wR</i> ( <i>F</i> <sup>2</sup> ) values (all data)                   | 0.0737                                                         | 0.1213                                         |

---

## 2.0 Cartesian coordinates of the optimized geometries

### 2.1 Raw data

#### $7\beta_A$

E = -1190.0622892 a. u.

|   |             |             |             |
|---|-------------|-------------|-------------|
| C | -1.86677500 | 3.07658800  | -1.85857800 |
| C | -1.87679700 | 4.30371700  | -1.18535200 |
| C | -1.00044800 | 4.51067400  | -0.11419200 |
| C | -0.12373200 | 3.50010500  | 0.28834100  |
| C | -0.11623500 | 2.25170300  | -0.37058000 |
| C | -0.99498300 | 2.06197500  | -1.45736700 |
| C | 0.80480800  | 1.18529700  | 0.07143500  |
| C | 2.17690800  | 1.47583900  | 0.59519400  |
| C | 2.85450900  | 0.16529400  | 0.97327100  |
| C | 1.81633100  | -0.94355200 | 0.61230200  |
| C | 0.60794900  | -0.16581000 | 0.09123200  |
| C | -0.63646500 | -0.90348200 | -0.24987600 |
| C | -0.73073000 | -1.62623500 | -1.40531400 |
| C | -1.89792100 | -2.41120300 | -1.76393800 |
| O | -2.96147700 | -2.39938200 | -0.82082900 |
| C | -1.75233300 | -0.91363500 | 0.69337900  |
| C | -2.89250000 | -1.67866000 | 0.36429500  |
| C | -1.76091800 | -0.21213900 | 1.91925000  |
| C | -2.86086600 | -0.27754300 | 2.76818800  |
| C | -3.98294500 | -1.04788400 | 2.41256800  |
| C | -4.00238600 | -1.75047000 | 1.20974200  |
| O | -2.04657100 | -3.07433600 | -2.78924600 |
| O | 2.69833800  | 2.59761300  | 0.71144700  |
| C | 4.09309000  | -0.17871000 | 0.08851200  |
| C | 2.59226200  | -1.81358200 | -0.43654700 |
| C | 4.74694900  | -1.45679300 | 0.68253000  |
| C | 3.70347200  | -2.57998800 | 0.34009200  |
| C | 3.42194300  | -0.74313200 | -1.19405500 |
| H | 3.12218500  | 0.19367300  | 2.03532900  |
| H | 1.51444400  | -1.56433300 | 1.46559300  |
| H | -2.53158900 | 2.91079500  | -2.70030900 |
| H | -2.55384200 | 5.09230700  | -1.49802100 |
| H | -0.99439000 | 5.46262900  | 0.40711800  |
| H | 0.56812400  | 3.67867900  | 1.10098500  |
| H | -0.98320900 | 1.12531800  | -2.00161000 |
| H | 0.06925000  | -1.63772000 | -2.13369900 |
| H | -0.90052900 | 0.38877700  | 2.18829300  |
| H | -2.85369300 | 0.26934900  | 3.70439700  |
| H | -4.83983700 | -1.09627300 | 3.07581700  |
| H | -4.85022000 | -2.35192700 | 0.90617600  |
| H | 4.93110000  | -1.36367000 | 1.75831300  |
| H | 5.71078300  | -1.65296500 | 0.19965500  |
| H | 3.30988300  | -3.07756800 | 1.23345300  |
| H | 4.14689900  | -3.35372700 | -0.29595400 |
| H | 4.14233200  | -1.18036800 | -1.89315400 |
| H | 2.81277400  | -0.00974400 | -1.73145200 |
| H | 4.77102400  | 0.66730400  | -0.04088800 |
| H | 1.95305100  | -2.46192500 | -1.03825200 |

#### $7\beta_B$

E = -1190.0607954 a. u.

|   |             |            |             |
|---|-------------|------------|-------------|
| C | -1.54526000 | 3.59247400 | -1.21087300 |
|---|-------------|------------|-------------|

|   |             |             |             |
|---|-------------|-------------|-------------|
| C | -1.01653600 | 4.82514900  | -0.81092800 |
| C | 0.19648900  | 4.86154600  | -0.11454800 |
| C | 0.87501700  | 3.67829200  | 0.18763200  |
| C | 0.34410400  | 2.42723500  | -0.19435100 |
| C | -0.87205200 | 2.40708800  | -0.90781800 |
| C | 1.05735700  | 1.18308900  | 0.15891600  |
| C | 2.55160000  | 1.11097900  | 0.24030500  |
| C | 2.95948500  | -0.27544700 | 0.72353600  |
| C | 1.62032500  | -1.06880900 | 0.83789500  |
| C | 0.54531100  | -0.04048700 | 0.48435300  |
| C | -0.88657600 | -0.39852600 | 0.68349100  |
| C | -1.46055300 | -0.14628700 | 1.89611800  |
| C | -2.82106400 | -0.52552300 | 2.23171700  |
| O | -3.54088100 | -1.20271800 | 1.20631200  |
| C | -1.66686300 | -1.06947600 | -0.35196400 |
| C | -2.99008600 | -1.45340800 | -0.04201800 |
| C | -1.19251500 | -1.33651500 | -1.65603900 |
| C | -2.00127600 | -1.97328100 | -2.59259400 |
| C | -3.31013400 | -2.35769400 | -2.24875400 |
| C | -3.80868000 | -2.09685700 | -0.97430000 |
| O | -3.39483500 | -0.33170100 | 3.30122100  |
| O | 3.35010000  | 2.02161300  | -0.03640400 |
| C | 3.79525200  | -1.08928300 | -0.30952700 |
| C | 1.84126000  | -2.25828200 | -0.16044200 |
| C | 4.23099100  | -2.41142600 | 0.38019400  |
| C | 2.88371000  | -3.21136000 | 0.49581800  |
| C | 2.69103500  | -1.59503300 | -1.27760300 |
| H | 3.49240300  | -0.17443000 | 1.67594100  |
| H | 1.42193800  | -1.46023100 | 1.84387100  |
| H | -2.47889700 | 3.55307000  | -1.76304200 |
| H | -1.54062800 | 5.74618900  | -1.04543500 |
| H | 0.61860400  | 5.81285000  | 0.19323700  |
| H | 1.82230000  | 3.71952100  | 0.70855300  |
| H | -1.28489800 | 1.46402800  | -1.24508800 |
| H | -0.91369200 | 0.35692900  | 2.68321400  |
| H | -0.18804800 | -1.03004700 | -1.92372700 |
| H | -1.62247900 | -2.16952500 | -3.58943000 |
| H | -3.93908900 | -2.85443200 | -2.97954000 |
| H | -4.81433700 | -2.37163400 | -0.68119600 |
| H | 4.70093800  | -2.23202700 | 1.35318100  |
| H | 4.95671800  | -2.94747100 | -0.24158900 |
| H | 2.62230400  | -3.45093200 | 1.53239700  |
| H | 2.93494100  | -4.15681800 | -0.05528700 |
| H | 3.06464400  | -2.31671700 | -2.01170800 |
| H | 2.17943800  | -0.78720600 | -1.81118000 |
| H | 4.60857500  | -0.50943000 | -0.75025200 |
| H | 0.92214800  | -2.75817700 | -0.47125700 |

#### TS-1 ( $7\beta_A \rightarrow 7\beta_B$ )

E = -1190.04409 a. u.

|   |            |             |             |
|---|------------|-------------|-------------|
| C | 3.93759500 | -1.87585000 | 1.39381800  |
| C | 4.67246900 | -2.37344800 | 0.31090700  |
| C | 4.35463500 | -1.96607600 | -0.98907000 |
| C | 3.30566400 | -1.06768900 | -1.20877700 |

|   |             |             |             |   |             |             |             |
|---|-------------|-------------|-------------|---|-------------|-------------|-------------|
| C | 2.54737800  | -0.57924000 | -0.12976600 | C | 0.07381800  | -2.51397400 | -0.37193700 |
| C | 2.88464600  | -0.98340200 | 1.17692800  | C | 0.90880300  | -3.69500900 | -0.31275500 |
| C | 1.48779300  | 0.43667600  | -0.35586600 | O | 2.27245100  | -3.46809000 | -0.08268500 |
| C | 1.95227900  | 1.81870200  | -0.67246400 | C | 1.94959200  | -1.02113700 | -0.02347300 |
| C | 0.75169800  | 2.73228100  | -0.78635500 | C | 2.77310600  | -2.17732900 | 0.04722100  |
| C | -0.46561800 | 1.80418400  | -0.48858000 | C | 2.62885700  | 0.20867600  | 0.11231200  |
| C | 0.11101400  | 0.39160800  | -0.31492600 | C | 4.00486000  | 0.28343800  | 0.31045700  |
| C | -0.73877800 | -0.83366100 | -0.15410900 | C | 4.77786600  | -0.88373200 | 0.38268300  |
| C | -0.10451800 | -2.04186000 | 0.00570300  | C | 4.15417400  | -2.11877000 | 0.24848000  |
| C | -0.75158100 | -3.32318500 | 0.18064000  | O | 0.51670500  | -4.85753900 | -0.43927500 |
| O | -2.15964300 | -3.29942200 | 0.19139100  | O | -2.35204800 | 2.88344000  | -0.69975700 |
| C | -2.22611300 | -0.86414400 | -0.18891900 | C | -4.03019800 | 0.43475100  | 0.34946200  |
| C | -2.86457700 | -2.12056700 | -0.00591600 | C | -2.68167500 | -1.35128300 | 0.77817200  |
| C | -3.10743000 | 0.22598500  | -0.40293800 | C | -4.94791900 | -0.77958500 | 0.03595300  |
| C | -4.49134500 | 0.07561500  | -0.41913100 | C | -4.02084900 | -2.01239600 | 0.33763100  |
| C | -5.07519400 | -1.18326200 | -0.21959600 | C | -3.19540500 | -0.10211800 | 1.54096300  |
| C | -4.25319600 | -2.28354100 | -0.01389200 | H | -3.40233700 | 0.52035300  | -1.76720100 |
| O | -0.18646700 | -4.40793900 | 0.32855000  | H | -2.07789800 | -1.42528400 | -1.34899800 |
| O | 3.13684100  | 2.16520400  | -0.81535900 | H | 1.66059100  | 4.23948800  | 2.34284900  |
| C | 0.69602200  | 3.81507600  | 0.33239600  | H | 2.68118300  | 5.38832500  | 0.38414800  |
| C | -1.06249900 | 2.44843000  | 0.82044200  | H | 2.17797000  | 4.58586100  | -1.91764000 |
| C | -0.53737500 | 4.71861700  | 0.05545000  | H | 0.68230000  | 2.63838800  | -2.25692500 |
| C | -1.75071900 | 3.78046900  | 0.39957000  | H | 0.17379700  | 2.28544600  | 2.00217100  |
| C | 0.20530200  | 2.97698500  | 1.54134500  | H | -0.95769900 | -2.76869800 | -0.53812800 |
| H | 0.72382300  | 3.18430100  | -1.78401400 | H | 2.07640100  | 1.12495200  | 0.06012500  |
| H | -1.18416600 | 1.83311300  | -1.31117700 | H | 4.47170300  | 1.25722900  | 0.40808100  |
| H | 4.18378400  | -2.18138800 | 2.40556300  | H | 5.84981800  | -0.82913300 | 0.53830500  |
| H | 5.48721100  | -3.06981500 | 0.48009500  | H | 4.70129100  | -3.05238000 | 0.29057200  |
| H | 4.92560500  | -2.34141500 | -1.83205600 | H | -5.30794600 | -0.76566300 | -0.99847400 |
| H | 3.07241000  | -0.74219600 | -2.21700900 | H | -5.82733000 | -0.77641200 | 0.68957900  |
| H | 2.31701500  | -0.59870400 | 2.01871200  | H | -3.89271400 | -2.66679000 | -0.53195200 |
| H | 0.96853700  | -2.11340300 | 0.01893500  | H | -4.42737800 | -2.62508400 | 1.14952000  |
| H | -2.72305700 | 1.21504000  | -0.56231800 | H | -3.80743400 | -0.36357300 | 2.41058600  |
| H | -5.11613100 | 0.94583000  | -0.58830100 | H | -2.40094800 | 0.57670200  | 1.86639100  |
| H | -6.15313300 | -1.30096000 | -0.22952100 | H | -4.55320900 | 1.38163600  | 0.49744500  |
| H | -4.64652500 | -3.28103700 | 0.13776500  | H | -2.02038600 | -2.01408700 | 1.33798600  |
| H | -0.56072400 | 5.07539300  | -0.97991600 |   |             |             |             |
| H | -0.52321200 | 5.59991700  | 0.70637000  |   |             |             |             |
| H | -2.43065000 | 3.64784500  | -0.45031200 |   |             |             |             |
| H | -2.34087700 | 4.18357800  | 1.22977000  |   |             |             |             |
| H | -0.03575000 | 3.58746400  | 2.41802000  |   |             |             |             |
| H | 0.90286300  | 2.19114100  | 1.84610800  |   |             |             |             |
| H | 1.63998700  | 4.35051100  | 0.45215100  |   |             |             |             |
| H | -1.69816400 | 1.77981500  | 1.40312100  |   |             |             |             |

### TS-2 ( $7\beta_A \rightarrow 7\beta_B$ )

E = -1190.0397672 a. u.

|   |             |             |             |
|---|-------------|-------------|-------------|
| C | 1.45863100  | 3.88499800  | 1.33715300  |
| C | 2.03071700  | 4.53244000  | 0.23563500  |
| C | 1.74945400  | 4.07950900  | -1.05872500 |
| C | 0.90739000  | 2.98029100  | -1.25206700 |
| C | 0.35317000  | 2.30478100  | -0.14987000 |
| C | 0.61913100  | 2.78342600  | 1.14678200  |
| C | -0.62420100 | 1.20371900  | -0.35390400 |
| C | -2.01960900 | 1.69001400  | -0.62133200 |
| C | -2.94816800 | 0.50951300  | -0.77013700 |
| C | -2.03571800 | -0.72082300 | -0.51362300 |
| C | -0.59524500 | -0.17248800 | -0.34110700 |
| C | 0.49331200  | -1.20920700 | -0.23475700 |

### $7\alpha_A$

E = -1190.0653552 a. u.

|   |             |             |             |
|---|-------------|-------------|-------------|
| C | -1.14907800 | -0.96263100 | 0.10853300  |
| C | -1.47610400 | -1.88873200 | 1.05849400  |
| C | -2.84132700 | -2.19671200 | 1.43942400  |
| O | -3.85212700 | -1.47625600 | 0.74320900  |
| C | -2.21757600 | -0.28003900 | -0.62181600 |
| C | -3.55252400 | -0.57191500 | -0.26694800 |
| C | -2.00709200 | 0.63010500  | -1.68029600 |
| C | -3.08010600 | 1.22690800  | -2.33454400 |
| C | -4.39861100 | 0.92730000  | -1.94762700 |
| C | -4.63797000 | 0.02491800  | -0.91409800 |
| O | -3.20130600 | -2.99295300 | 2.30517500  |
| H | -0.71362700 | -2.44762900 | 1.58339100  |
| H | -0.99305500 | 0.85787300  | -1.98383200 |
| H | -2.89806500 | 1.92257000  | -3.14631500 |
| H | -5.23430400 | 1.39372100  | -2.45827000 |
| H | -5.63976100 | -0.23779500 | -0.59742000 |
| C | 0.27542200  | -0.73371600 | -0.21933900 |
| C | 1.12708300  | -1.86786800 | -0.67610700 |
| C | 2.50470600  | -1.32676200 | -1.03588800 |
| C | 2.44064400  | 0.19153700  | -0.67858900 |

|   |             |             |             |   |             |             |             |
|---|-------------|-------------|-------------|---|-------------|-------------|-------------|
| C | 1.01781800  | 0.41666200  | -0.16862100 | H | 3.09453600  | 0.48088000  | -1.31644700 |
| O | 0.79098800  | -3.06254100 | -0.72845500 | H | 5.15243800  | -2.03060900 | -0.66344100 |
| C | 3.64909100  | -1.87163800 | -0.12589200 | H | 5.38605000  | -2.29245400 | 1.06751300  |
| C | 3.56728600  | 0.34670100  | 0.39851700  | H | 5.16870200  | 0.34992800  | -0.26082600 |
| C | 4.99137600  | -1.32747400 | -0.68983000 | H | 5.37226200  | 0.03607100  | 1.46545700  |
| C | 4.93149500  | 0.20306300  | -0.33662400 | H | 3.36148700  | -1.31616600 | 2.55163600  |
| C | 3.47831600  | -1.00709600 | 1.15241800  | H | 1.74498900  | -1.21747100 | 1.81949500  |
| H | 2.70721700  | -1.53042100 | -2.09318800 | H | 3.08743200  | -3.21621300 | 0.66452500  |
| H | 2.64383100  | 0.84060100  | -1.53926000 | H | 3.09581400  | 1.04498500  | 1.36405300  |
| H | 5.08936500  | -1.50932300 | -1.76553400 | C | -0.87589900 | 3.60208000  | -1.22320500 |
| H | 5.83997300  | -1.81371500 | -0.19581900 | C | 0.09192000  | 4.57457800  | -0.94384800 |
| H | 4.98976100  | 0.84287100  | -1.22464000 | C | 1.37312800  | 4.17573200  | -0.54785900 |
| H | 5.75503800  | 0.48895400  | 0.32687600  | C | 1.68052900  | 2.81961200  | -0.42315800 |
| H | 4.29206500  | -1.14584100 | 1.87193700  | C | 0.71010600  | 1.82189200  | -0.67450100 |
| H | 2.52618200  | -1.16266200 | 1.66886200  | C | -0.57276500 | 2.24682900  | -1.09226000 |
| H | 3.60936200  | -2.95518600 | 0.00176600  | H | -1.86662300 | 3.89851000  | -1.55157900 |
| H | 3.47623600  | 1.25079700  | 1.00422800  | H | -0.14667600 | 5.62832600  | -1.04442600 |
| C | -0.71888400 | 3.12021700  | 1.85601500  | H | 2.13580500  | 4.91963800  | -0.34152000 |
| C | -0.14418000 | 4.27937500  | 1.32065800  | H | 2.68326900  | 2.53754300  | -0.12911000 |
| C | 0.81263700  | 4.17169900  | 0.30451300  | H | -1.32766500 | 1.51440100  | -1.34398700 |
| C | 1.19174400  | 2.91536300  | -0.17272100 |   |             |             |             |
| C | 0.60685100  | 1.73706800  | 0.34199000  |   |             |             |             |
| C | -0.35049000 | 1.86384100  | 1.37246800  |   |             |             |             |
| H | -1.45103100 | 3.19403100  | 2.65335700  |   |             |             |             |
| H | -0.43445800 | 5.25544000  | 1.69547500  |   |             |             |             |
| H | 1.26534200  | 5.06491300  | -0.11367600 |   |             |             |             |
| H | 1.93484700  | 2.84975800  | -0.95984100 |   |             |             |             |
| H | -0.78850700 | 0.97398800  | 1.80791200  |   |             |             |             |

### $7\alpha_B$

E = -1190.062993 a. u.

|   |             |             |             |
|---|-------------|-------------|-------------|
| C | -1.25016800 | -0.78176100 | -0.50159200 |
| C | -1.94194000 | -1.38947800 | -1.51100800 |
| C | -3.38217700 | -1.56259800 | -1.50468000 |
| O | -4.05621100 | -1.07189300 | -0.35128300 |
| C | -1.97474300 | -0.32401200 | 0.68560900  |
| C | -3.37590500 | -0.49499100 | 0.71283000  |
| C | -1.36568900 | 0.25825500  | 1.81830300  |
| C | -2.12520200 | 0.65461000  | 2.91481100  |
| C | -3.52033200 | 0.47829500  | 2.90859000  |
| C | -4.14889900 | -0.09860400 | 1.80770500  |
| O | -4.06543700 | -2.07037600 | -2.39239400 |
| H | -1.43506000 | -1.77897000 | -2.38319800 |
| H | -0.29129800 | 0.39364400  | 1.82725400  |
| H | -1.63859000 | 1.09880800  | 3.77618600  |
| H | -4.11122000 | 0.78715400  | 3.76422900  |
| H | -5.21966600 | -0.25687400 | 1.77162000  |
| C | 0.22423600  | -0.69362600 | -0.58301800 |
| C | 1.01735000  | -1.94759400 | -0.71193900 |
| C | 2.49819800  | -1.59145400 | -0.73243200 |
| C | 2.52870000  | -0.04179500 | -0.53751600 |
| C | 1.06301500  | 0.39421500  | -0.57225900 |
| O | 0.55954200  | -3.09945600 | -0.79566200 |
| C | 3.27290200  | -2.15394800 | 0.49478000  |
| C | 3.26818100  | 0.09758800  | 0.84977900  |
| C | 4.76930800  | -1.76876400 | 0.32873700  |
| C | 4.76967200  | -0.21872600 | 0.58651200  |
| C | 2.81830600  | -1.17687700 | 1.61087200  |
| H | 2.93987000  | -1.92408100 | -1.67823600 |

### TS-1 ( $7\alpha_A \rightarrow 7\alpha_B$ )

E = -1190.0409132 a. u.

|   |             |             |             |
|---|-------------|-------------|-------------|
| C | -1.42633500 | 0.02824400  | -0.05759300 |
| C | -1.54582000 | 1.39744900  | -0.06562400 |
| C | -2.77443800 | 2.15418800  | 0.00400900  |
| O | -3.95473200 | 1.39984900  | 0.06024300  |
| C | -2.70509200 | -0.73283700 | -0.01994900 |
| C | -3.91779200 | 0.01052600  | 0.02828400  |
| C | -2.86740900 | -2.13949100 | -0.05329200 |
| C | -4.12228600 | -2.74255300 | -0.04276600 |
| C | -5.29054700 | -1.96984800 | 0.00509700  |
| C | -5.18141900 | -0.58534600 | 0.04317300  |
| O | -2.86342000 | 3.38557800  | 0.01764900  |
| H | -0.68935100 | 2.04075200  | -0.12934000 |
| H | -1.99393800 | -2.76796300 | -0.04941900 |
| H | -4.18517900 | -3.82527900 | -0.06529000 |
| H | -6.26795500 | -2.44042300 | 0.01496200  |
| H | -6.04672200 | 0.06484600  | 0.08100900  |
| C | -0.02570700 | -0.53519800 | -0.17747100 |
| C | 0.41362700  | -1.98137900 | -0.19005100 |
| C | 1.85427200  | -2.08382700 | -0.66740200 |
| C | 2.35858800  | -0.62512300 | -0.67414400 |
| C | 1.13558700  | 0.20669700  | -0.31384000 |
| O | -0.19174700 | -2.99068000 | 0.21223100  |
| C | 2.78590200  | -2.80310900 | 0.35224300  |
| C | 3.52089300  | -0.64434300 | 0.37752400  |
| C | 4.19629000  | -2.90431000 | -0.29169800 |
| C | 4.70493100  | -1.41701700 | -0.27270700 |
| C | 3.00546000  | -1.68460800 | 1.40822400  |
| H | 1.86838500  | -2.57574300 | -1.64710200 |
| H | 2.74120600  | -0.27680700 | -1.64286000 |
| H | 4.15808000  | -3.32398200 | -1.30299700 |
| H | 4.84583300  | -3.55223700 | 0.30718700  |
| H | 4.94310600  | -1.03897000 | -1.27317400 |
| H | 5.60787700  | -1.31449000 | 0.33913500  |
| H | 3.75855500  | -1.94700900 | 2.15840900  |
| H | 2.08874800  | -1.38210400 | 1.92473700  |
| H | 2.37019600  | -3.74551700 | 0.71217300  |

|   |            |            |             |   |            |             |             |
|---|------------|------------|-------------|---|------------|-------------|-------------|
| H | 3.78467900 | 0.34275700 | 0.76142400  | C | 2.44264600 | -1.67282400 | -0.68436000 |
| C | 2.14826400 | 3.78134400 | -1.09118400 | C | 2.43600300 | -0.13431300 | -0.62569600 |
| C | 2.16347400 | 4.35299000 | 0.18548500  | C | 0.98902100 | 0.24952800  | -0.30047900 |
| C | 1.81739100 | 3.57632000 | 1.29807700  | O | 0.75167600 | -3.26066600 | -0.06691600 |
| C | 1.44743500 | 2.23883200 | 1.13641000  | C | 3.51465400 | -2.09543300 | 0.36522700  |
| C | 1.42232900 | 1.65595400 | -0.14737900 | C | 3.50484500 | 0.18126200  | 0.47890100  |
| C | 1.79364700 | 2.43861500 | -1.25741000 | C | 4.90587400 | -1.71125600 | -0.20883300 |
| H | 2.41156100 | 4.37806000 | -1.95833000 | C | 4.89820100 | -0.14165700 | -0.13592700 |
| H | 2.43913000 | 5.39437900 | 0.31312200  | C | 3.31757500 | -1.00880000 | 1.45785300  |
| H | 1.82881600 | 4.01291600 | 2.29127100  | H | 2.66266300 | -2.08934000 | -1.67393400 |
| H | 1.16613100 | 1.64381300 | 1.99920500  | H | 2.71679800 | 0.35915200  | -1.56504900 |
| H | 1.78255900 | 2.00199300 | -2.25121600 | H | 5.04884100 | -2.08604200 | -1.22820400 |

**TS-2 ( $7\alpha_a \rightarrow 7\alpha_b$ )**

E = -1190.0366235 a. u.

|   |             |             |             |   |            |             |             |
|---|-------------|-------------|-------------|---|------------|-------------|-------------|
| C | -1.35563900 | -1.00183700 | -0.03975600 | H | 5.70569000 | -2.13237200 | 0.41030700  |
| C | -1.81197500 | -2.29971300 | -0.05179400 | H | 5.03390500 | 0.32800200  | -1.11657000 |
| C | -3.19759400 | -2.71760100 | -0.02797200 | H | 5.69638000 | 0.22890100  | 0.51671800  |
| O | -4.15508000 | -1.68769400 | -0.01346200 | H | 4.08640900 | -1.04258600 | 2.23668400  |
| C | -2.40436200 | 0.05055900  | 0.05155900  | H | 2.33333300 | -1.04091100 | 1.93642000  |
| C | -3.76621100 | -0.35729600 | 0.04758700  | H | 3.41245000 | -3.13588500 | 0.67801800  |
| C | -2.20521700 | 1.44319200  | 0.16007200  | H | 3.42676100 | 1.18504200  | 0.89942100  |
| C | -3.25709400 | 2.35311900  | 0.23226300  | C | 0.73170200 | 3.90912300  | -1.27034400 |
| C | -4.58474700 | 1.90697400  | 0.20080100  | C | 0.80130900 | 4.53906400  | -0.02208000 |
| C | -4.83381700 | 0.54277900  | 0.11177400  | C | 0.90551900 | 3.76539300  | 1.13999300  |
| O | -3.60062100 | -3.88233800 | -0.03779800 | C | 0.93007000 | 2.36926600  | 1.05781700  |
| H | -1.12405100 | -3.12805100 | -0.08171200 | C | 0.83952300 | 1.72690500  | -0.19340000 |
| H | -1.20941900 | 1.83032400  | 0.19913200  | C | 0.76270100 | 2.51392200  | -1.35825100 |
| H | -3.03496200 | 3.41143800  | 0.31562300  | H | 0.65376400 | 4.50218900  | -2.17580200 |
| H | -5.40868200 | 2.61044000  | 0.25301800  | H | 0.77905100 | 5.62180000  | 0.04419300  |
| H | -5.83766000 | 0.13652200  | 0.09668900  | H | 0.96653600 | 4.24635900  | 2.11087400  |
| C | 0.14001000  | -0.83279100 | -0.18271400 | H | 0.99822200 | 1.77269100  | 1.96164900  |
| C | 1.03404400  | -2.07131200 | -0.29287200 | H | 0.70393700 | 2.03040000  | -2.32827600 |



## 2.2 Complete Reference for Ref. 15 – “Gaussian 03” details.

M. J. Frisch, G. W. Trucks, H. B. Schlegel, G. E. Scuseria, M. A. Robb, J. R. Cheeseman, J. A. Montgomery, Jr., T. Vreven, K. N. Kudin, J. C. Burant, J. M. Millam, S. S. Iyengar, J. Tomasi, V. Barone, B. Mennucci, M. Cossi, G. Scalmani, N. Rega, G. A. Petersson, H. Nakatsuji, M. Hada, M. Ehara, K. Toyota, R. Fukuda, J. Hasegawa, M. Ishida, T. Nakajima, Y. Honda, O. Kitao, H. Nakai, M. Klene, X. Li, J. E. Knox, H. P. Hratchian, J. B. Cross, V. Bakken, C. Adamo, J. Jaramillo, R. Gomperts, R. E. Stratmann, O. Yazyev, A. J. Austin, R. Cammi, C. Pomelli, J. W. Ochterski, P. Y. Ayala, K. Morokuma, G. A. Voth, P. Salvador, J. J. Dannenberg, V. G. Zakrzewski, S. Dapprich, A. D. Daniels, M. C. Strain, O. Farkas, D. K. Malick, A. D. Rabuck, K. Raghavachari, J. B. Foresman, J. V. Ortiz, Q. Cui, A. G. Baboul, S. Clifford, J. Cioslowski, B. B. Stefanov, G. Liu, A. Liashenko, P. Piskorz, I. Komaromi, R. L. Martin, D. J. Fox, T. Keith, M. A. Al-Laham, C. Y. Peng, A. Nanayakkara, M. Challacombe, P. M. W. Gill, B. Johnson, W. Chen, M. W. Wong, C. Gonzalez and J. A. Pople, *Gaussian 03* (revision B.05), Gaussian, Inc., Pittsburgh, PA, 2003.

### 3.0 Representative NMR spectra (all run at 298 K in CDCl<sub>3</sub>).

<sup>1</sup>H NMR (400 MHz) spectrum of compound **5**.

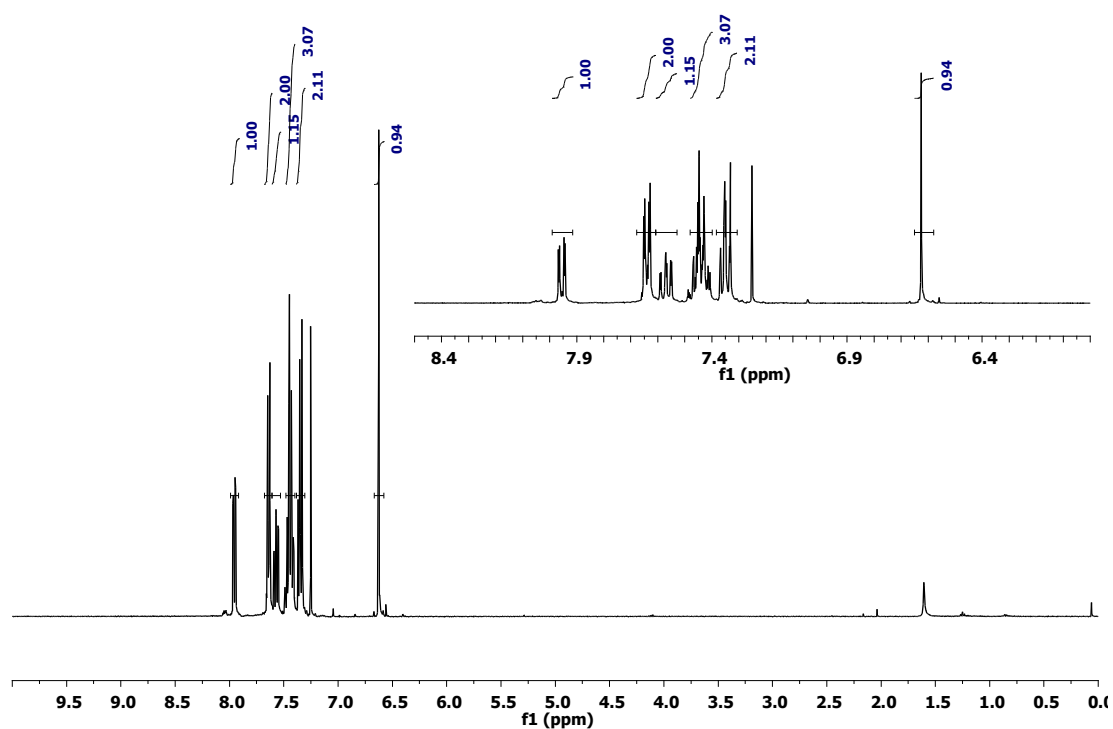

<sup>13</sup>C{<sup>1</sup>H} (100 MHz) NMR spectrum of compound **5**.

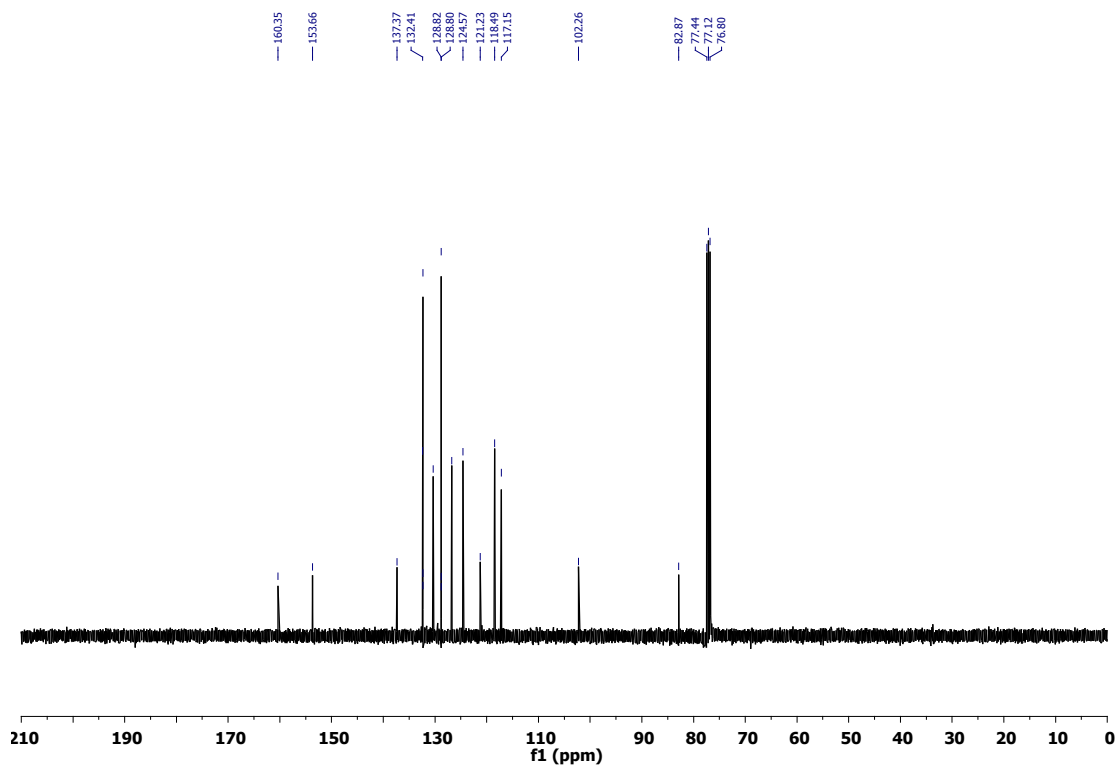

$^{13}\text{C}\{^1\text{H}\}$  DEPT135 (100 Mhz) NMR spectrum of compound **5**.

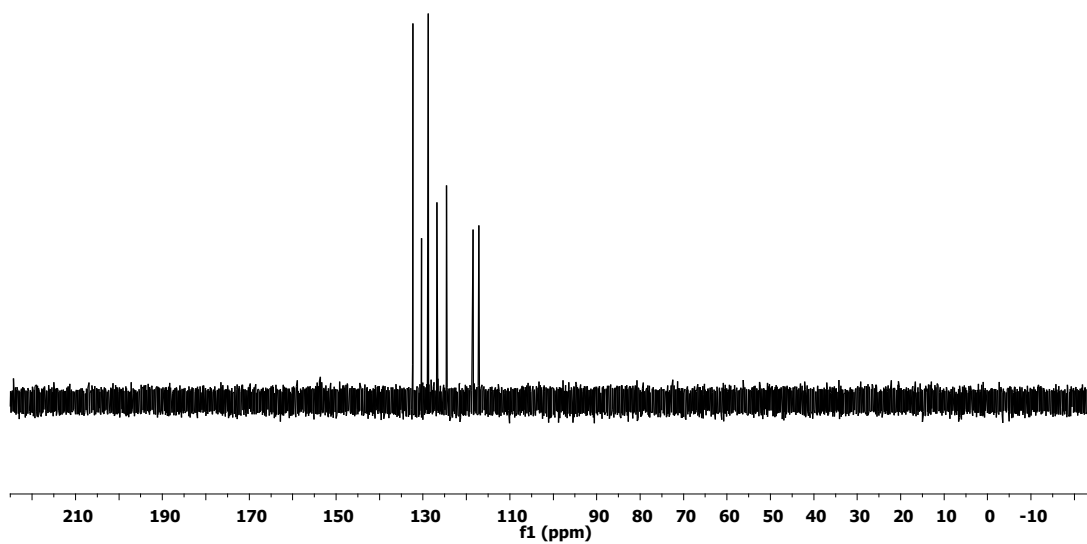

$^1\text{H}$  NMR (500 Mhz) spectrum of complex **6**.

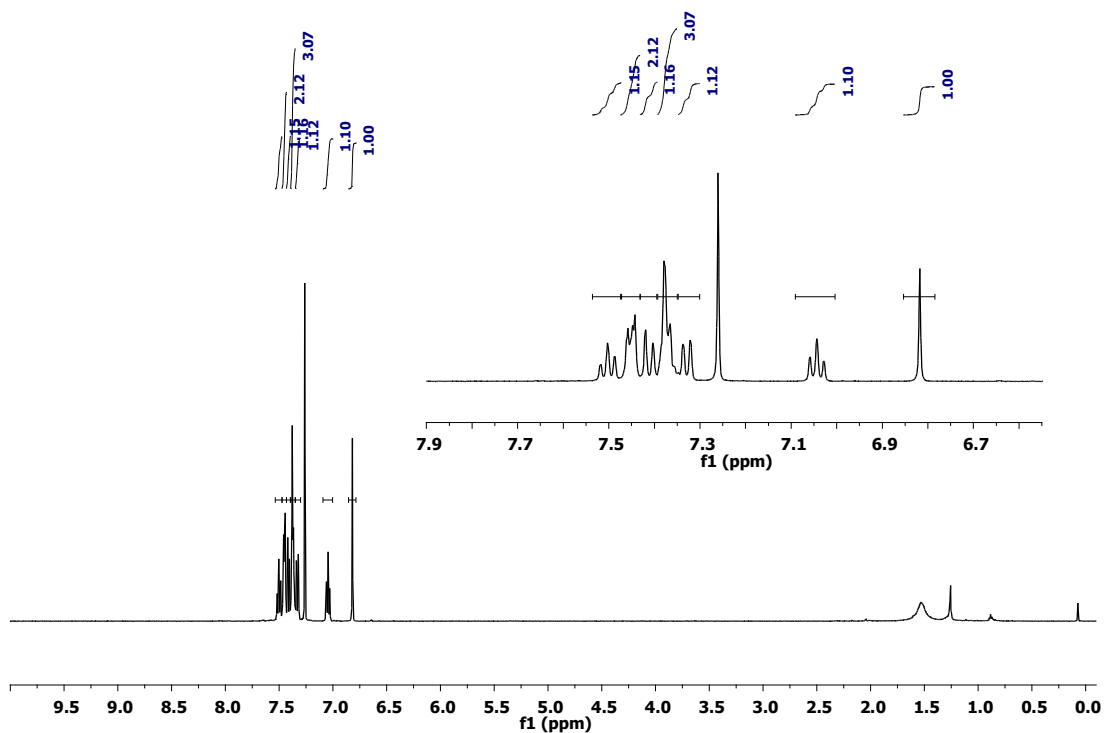

$^{13}\text{C}\{^1\text{H}\}$  (125 MHz) NMR spectrum of complex **6**.

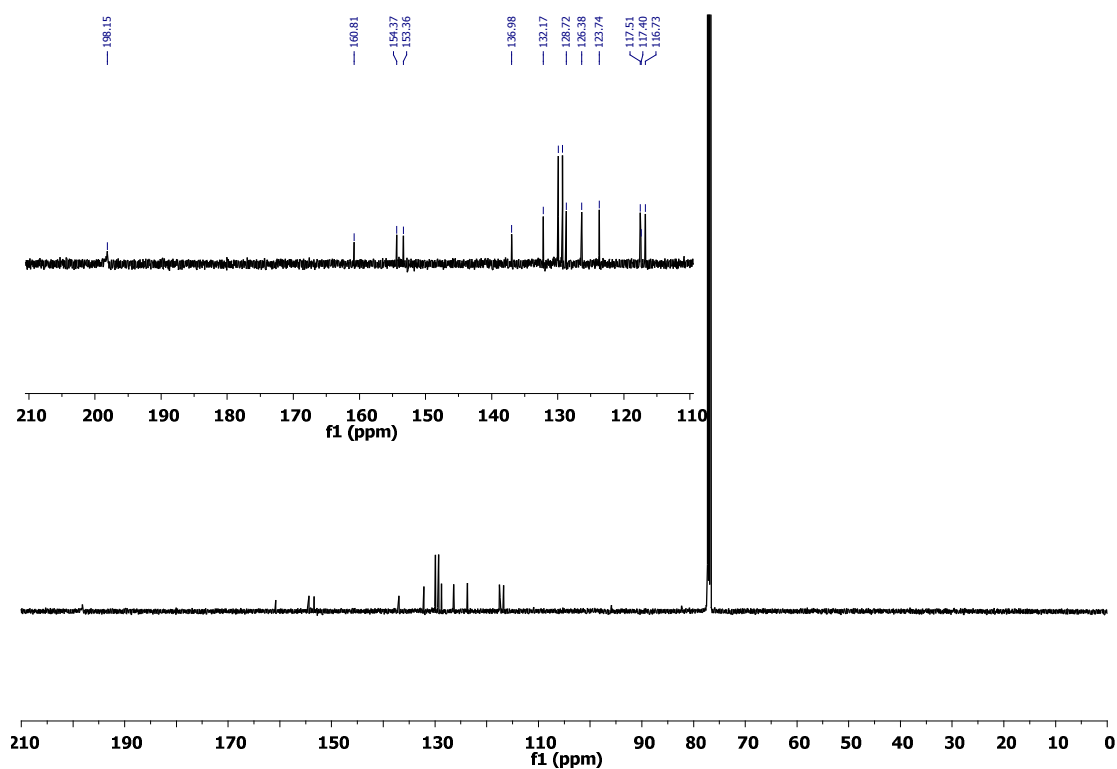

$^{13}\text{C}\{^1\text{H}\}$  DEPT135 (125 MHz) NMR spectrum of complex **6**.

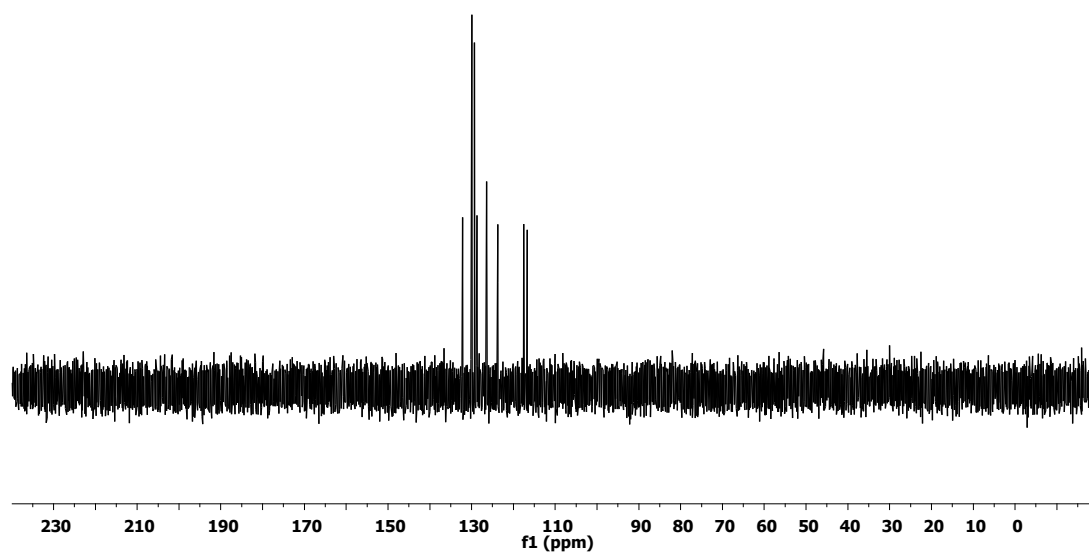

$^1\text{H}$  NMR (500 Mhz) spectrum of regioisomer  $7\alpha$ .\*

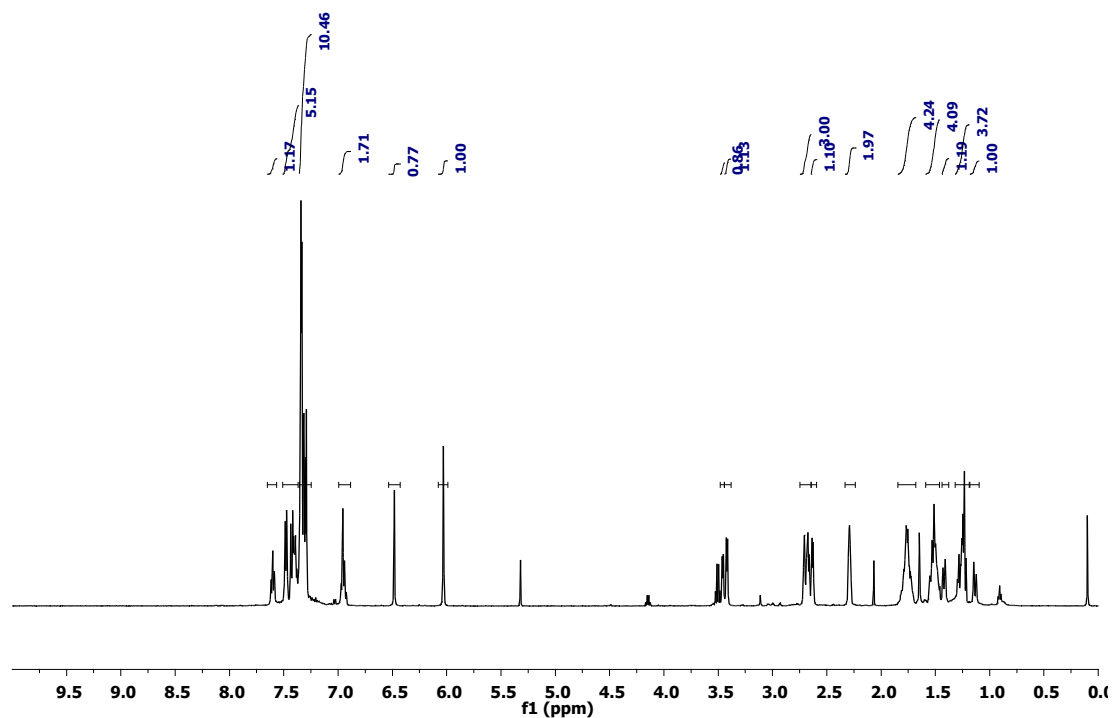

\* Note: trace diethyl ether impurity in this  $^1\text{H}$  NMR spectrum.

$^{13}\text{C}\{^1\text{H}\}$  (125 MHz) NMR spectrum of regioisomer  $7\alpha$ .

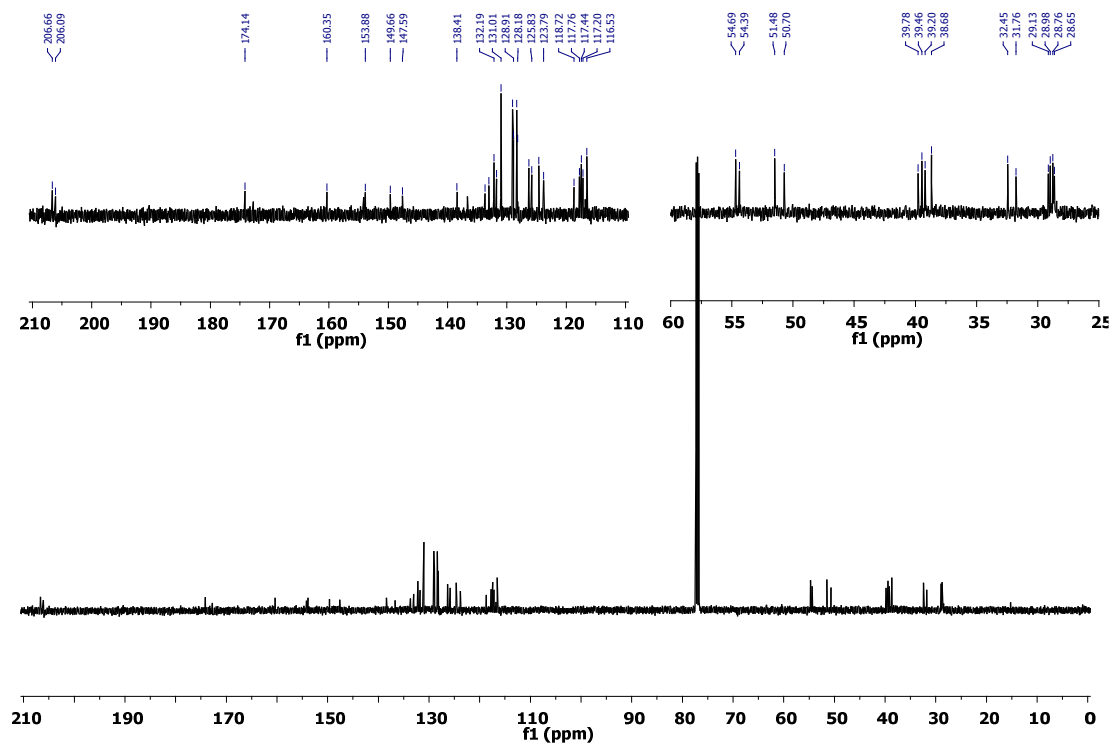

$^{13}\text{C}\{^1\text{H}\}$  DEPT135 (125 MHz) NMR spectrum of regioisomer **7 $\alpha$** .

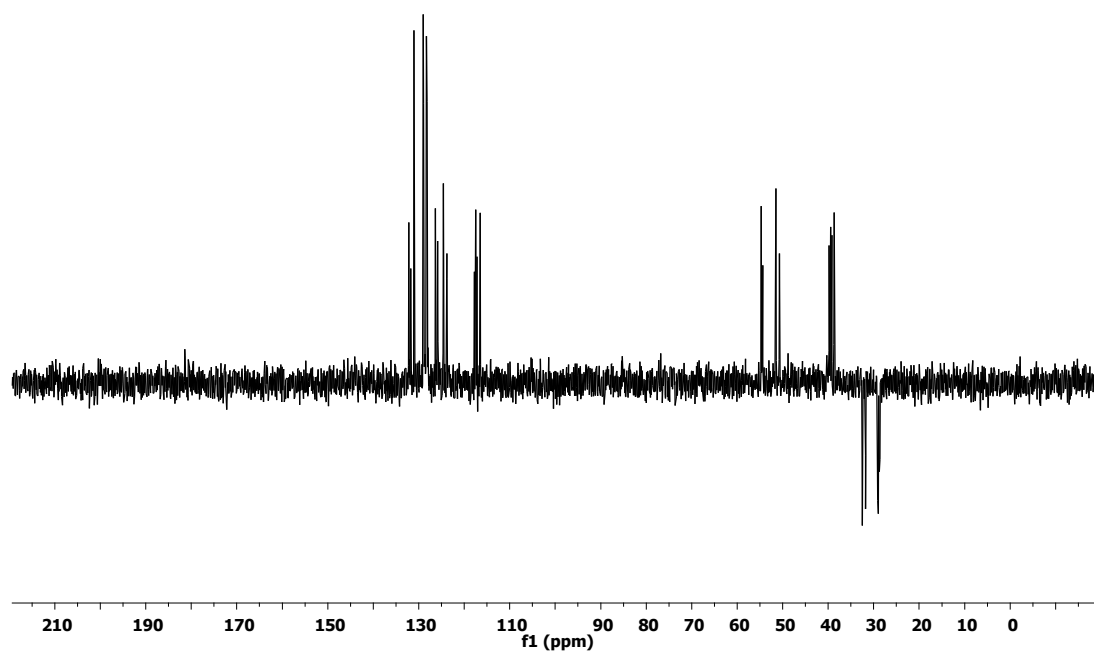

$^1\text{H}$  NMR (500 Mhz) spectrum of regioisomer **7 $\beta$**  (mixture of atropisomers at room temperature).

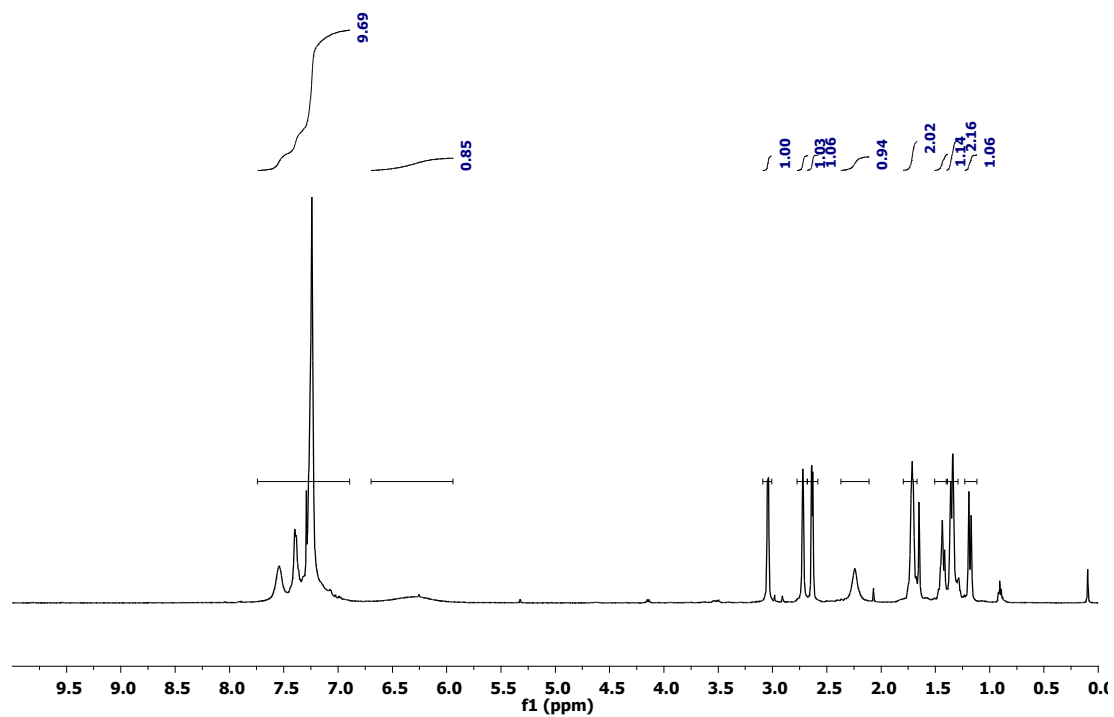

$^{13}\text{C}\{^1\text{H}\}$  (125 MHz) NMR spectrum of regioisomer **7 $\beta$** .

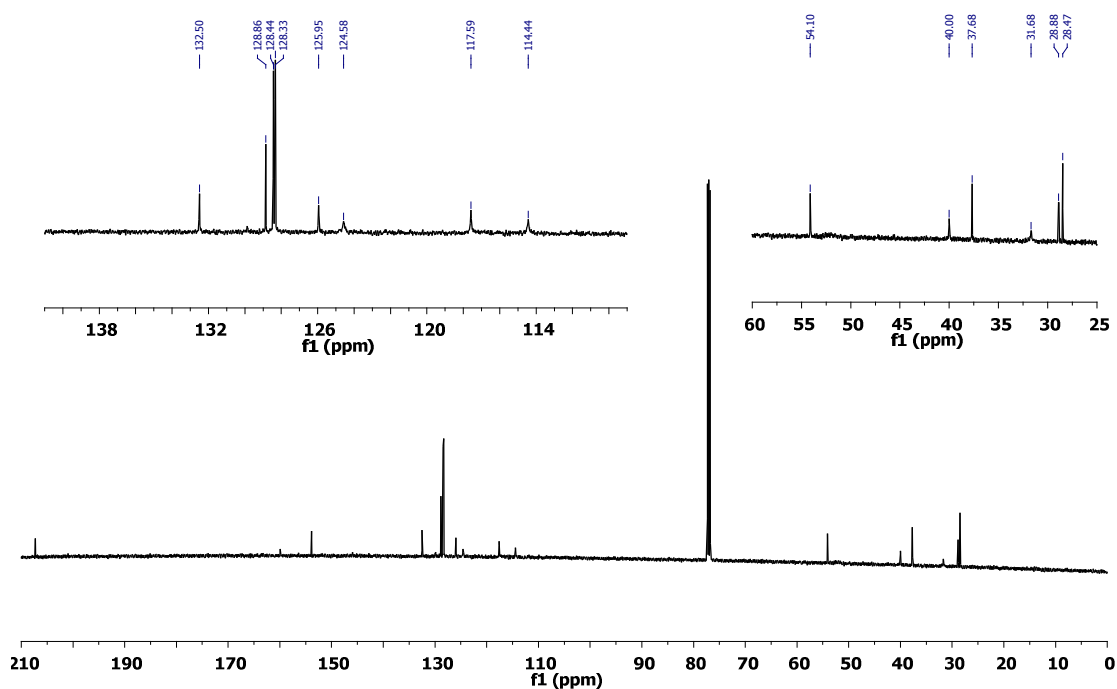

$^{13}\text{C}\{^1\text{H}\}$  DEPT135 (125 MHz) NMR spectrum of regioisomer **7 $\beta$** .

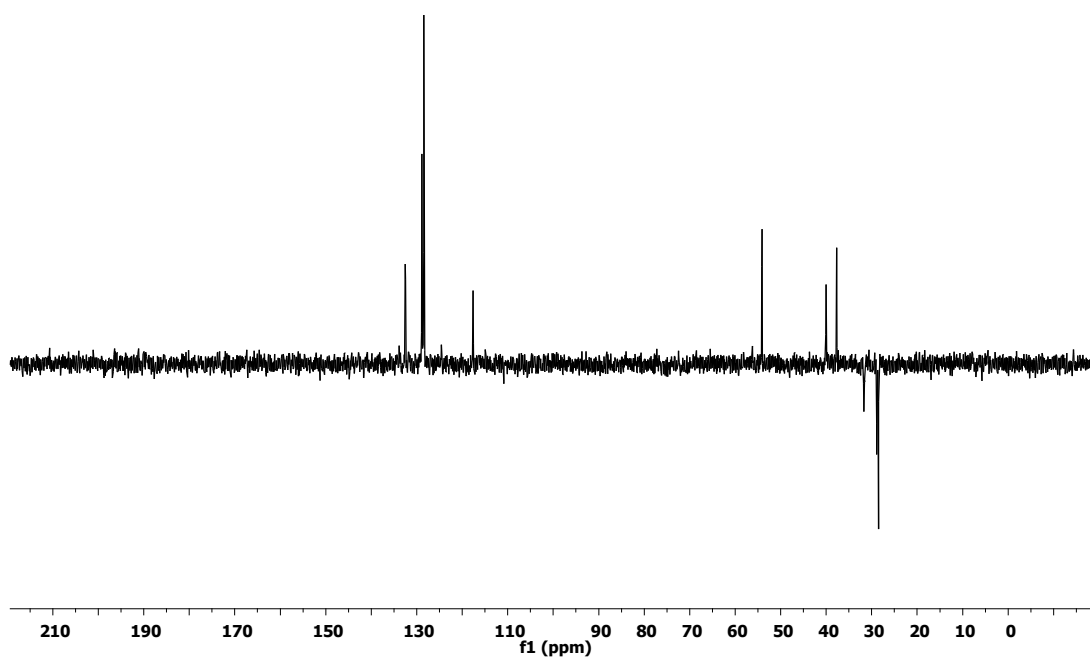

Supplement: c0ob00264j.pdf [file c0ob00264j.pdf]
